# Supplementary material for: LSA SAF Meteosat FRP products – Part 1: Algorithms, product contents, and analysis
Source: Copernicus journal article supplement (doi:10.5194/acp-15-13217-2015), 2015-11-30
Supplement: Supplementary file 1 [file acp-15-13217-2015-supplement.pdf]

Supplement of Atmos. Chem. Phys., 15, 13217–13239, 2015  
<http://www.atmos-chem-phys.net/15/13217/2015/>  
doi:10.5194/acp-15-13217-2015-supplement  
© Author(s) 2015. CC Attribution 3.0 License.

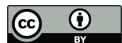

Atmospheric  
Chemistry  
and Physics  
Open Access  
EGU

*Supplement of*

## **LSA SAF Meteosat FRP products – Part 1: Algorithms, product contents, and analysis**

**M. J. Wooster et al.**

*Correspondence to:* G. Roberts ([g.j.roberts@soton.ac.uk](mailto:g.j.roberts@soton.ac.uk))

The copyright of individual parts of the supplement might differ from the CC-BY 3.0 licence.

4  
5  
6  
7  
8  
9  
10  
11

## Supplementary Material

### S1. SEVIRI DISK

Figure S1 shows the full geographic coverage of SEVIRI, along with the four geographic regions (Europe, South America, southern Africa, northern Africa) that LSA SAF products are currently delivered in.

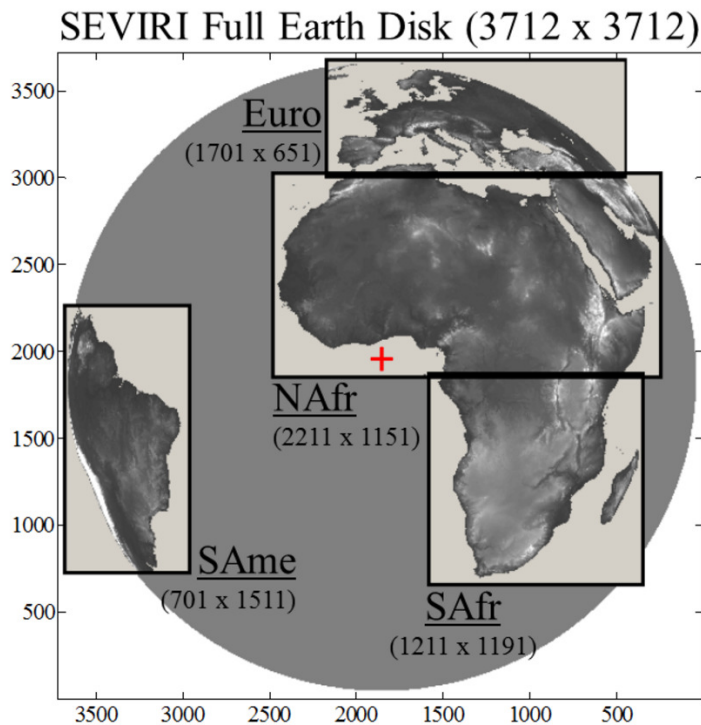

12  
13  
14  
15  
16  
17  
18  
19  
20  
21  
22  
23  
24

Figure S1. The four regions of the Meteosat disk currently used for deriving the LSA SAF products (shown here as an elevation map). Oceanic areas are not processed by the LSA SAF, and for most LSA SAF products information from each geographic region is delivered in separate product files. The location of the sub-satellite point (SSP) is shown as the red cross. Later in 2015 the LSA SAF will switch to delivering full-disk data for most products, including the FRP products described herein.

## S2. LSA SAF FRP PRODUCT ACCESS AND FILE STRUCTURE

### S2.1. Product Data Access

25 Users can access the LSA SAF FRP-PIXEL and FRP-GRID products from the  
26 following three sources:

27

28 (i) in real time via EUMETCast using very low-cost Digital Video Broadcast (DVB-  
29 S2) technology to receive multiple EO datasets and products  
30 (<http://www.eumetsat.int/website/home/Data/DataDelivery/EUMETCast/index.html>).

31 EUMETCast primary transmissions is via Eutelsat's Eurobird-9 satellite (in Ku band)  
32 and can be received across most of Europe, and is relayed via Eutelsat's Atlantic  
33 Bird 3 (in C band, covers Europe and Africa) and SES New Skies' NSS-806 (in C  
34 band, covers both Americas). EUMETCast is part of the wider GEONETcast service,  
35 a near real time, global network of satellite-based data dissemination systems  
36 designed to distribute space-based, airborne and *in situ* data, metadata and products,  
37 led by Eumetsat in Europe (services in Europe, Africa and South America), the  
38 Chinese Meteorological Administration (CMA) in the Asia-Pacific region  
39 (FengYunCast), and NOAA in the Western Hemisphere (GEONETCast Americas).  
40 FRP-PIXEL product dissemination on GEONETcast is described at  
41 [www.eumetsat.int/website/home/Data/Products/index.html](http://www.eumetsat.int/website/home/Data/Products/index.html)

42

43 (ii) in real time via FTP, contact the LSA SAF ([landsaf.helpdesk@ipma.pt](mailto:landsaf.helpdesk@ipma.pt) and  
44 <http://landsaf.ipma.pt>) to review the current options, and to obtain the FRP product  
45 Algorithm Theoretical Basis Document (ATBD) and User Manuals.

46

47 (iii) in archive form via the EUMETSAT Earth Observation (EO) Portal  
48 (<http://eoportal.eumetsat.int>) for which use registration is required.

49

## 50 **S2.2. FRP-PIXEL Product Files**

51 All FRP products from the aforementioned sources are stored in the HDF5 file  
52 format. A new FRP-PIXEL Product (both the List and Quality Product files) is  
53 delivered every 15 mins for each of the four LSA SAF geographic regions, with file  
54 names constructed according to the following convention:

55

56 HDF5\_LSASAF\_MSG\_FRP\_ListProduct\_<Area>\_YYYYMMDDHHMM.h5

57

58 HDF5\_LSASAF\_MSG\_FRP\_QualityProduct\_<Area>\_YYYYMMDDHHMM.h5

59

60 Where <Area>, YYYY, MM, DD, HH and MM respectively denote the geographical  
61 region (Euro, NAfr, SAfr, SAm), and the year, month, day, hour and minute of the  
62 data acquisition. The time specified in the filename refers to the relevant image  
63 acquisition start time (with SEVIRI scanning South to North as described in  
64 Section 2).

65

66 Since the FRP-PIXEL List Product file stores outputs (e.g. FRP, FRP uncertainty,  
67 active fire pixel location etc), algorithm information (e.g. size of the background  
68 window) and input data (e.g. IR3.9 and IR10.8 brightness temperatures) at the pixel

69 locations of detected active fire pixels only, it is typically only some kilobytes in size.  
 70 The full list of variables is detailed in the FRP Product User Manual (PUM) available  
 71 on the LSA SAF web site (<http://landsaf.ipma.pt>) and many users will be content to  
 72 use only this (very small) product file. The FRP-PIXEL Quality Product files are  
 73 significantly larger (~ 0.05 - 0.2 Mb), since they store values at all SEVIRI pixels  
 74 whether a fire is detected or not, but the additional information (e.g. on why an active  
 75 fire was not recorded at a certain ground locations) can be extremely useful, for  
 76 example for emissions modelling and when comparing to other datasets e.g. (Freeborn  
 77 *et al.* 2014a; Georgiev and Stoyanova, 2013) and is used with the FRP-based Global  
 78 Fire Assimilation System (Kaiser *et al.*, 2012). Both List and Quality Product files are  
 79 mandatory inputs to the algorithm that generates the FRP-GRID product. Table S1  
 80 shows the coding present within each SEVIRI pixel recorded in the Quality Product  
 81 file, whilst Figure S2 shows an example.

Deleted: ,

82

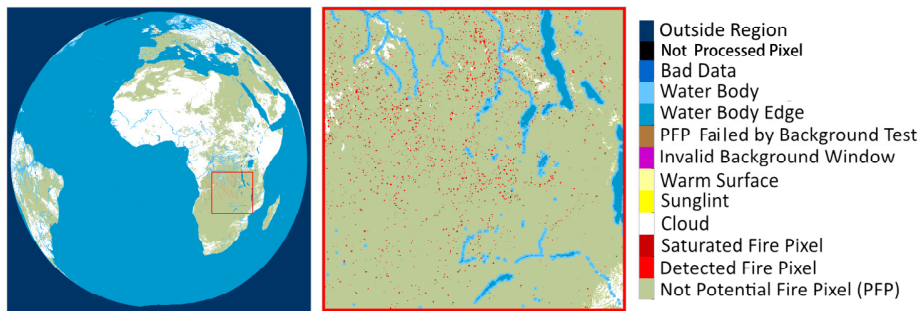

83

84

85 Figure S2. FRP-PIXEL quality product classification scheme applied to the Meteosat  
 86 full disk data taken at 13:00 UTC on 5<sup>th</sup> July 2015, with a colour palette applied. The  
 87 figure on the left shows the full disk, whilst a zoom over where the majority of fires  
 88 are occurring at this time is at right. The panel shows the classification names, also  
 89 detailed in Table S1.

Formatted: Superscript

90

91

92 Table S1. QUALITY FLAG coding within the FRP-PIXEL Quality Product files.

93

| NAME            | VALUE | STATUS            | REASON                                                                                                                                       |
|-----------------|-------|-------------------|----------------------------------------------------------------------------------------------------------------------------------------------|
| FRP_APL_NOTPOT  | 0     | FRP NOT Estimated | Not a potential fire pixel (see ATBD Section 3.4)                                                                                            |
| FRP_APL_FRP     | 1     | FRP Estimated     | Successful fire detection and FRP estimation.                                                                                                |
| FRP_APL_FRP_SAT | 2     | FRP Estimated     | FRP estimated but with a saturated 3.9 micron channel signal. Please refer to the ATBD Section 3.6 for FRP estimation over saturated pixels. |
| FRP_APL_CLOUD   | 3     | FRP NOT Estimated | The pixel is classed as cloud contaminated - fire detection was not attempted                                                                |
| FRP_APL_SUNG    | 4     | FRP NOT Estimated | The pixel is classed as being affected by sun glint due to the sun-land-sensor angular condition - fire detection was not                    |

|                   |     |                   |                                                                                                                                                                                                                         |
|-------------------|-----|-------------------|-------------------------------------------------------------------------------------------------------------------------------------------------------------------------------------------------------------------------|
|                   |     |                   | attempted.                                                                                                                                                                                                              |
| FRP_APL_SUNGRATIO | 5   | FRP NOT Estimated | The SUNGRATIO test failed (see ATBD Section 3.4, Equation 30)                                                                                                                                                           |
| FRP_APL_NOBCK     | 6   | FRP NOT Estimated | It was not possible to define the background temperature of the candidate potential fire pixel.                                                                                                                         |
| FRP_APL_BCKNOT    | 7   | FRP NOT Estimated | The signal of the potential fire pixel was not sufficiently above that of the background window – so the pixel was not confirmed as a true fire (see ATBD Section 3.6)                                                  |
| FRP_APL_CLOUDEDGE | 8   | FRP NOT Estimated | No fire detection took place because the pixel is too close to a cloud or water edge (this class was used in previous versions of the FRP-PIXEL products, but is not used in version 2.0 onwards (i.e. since end 2015)) |
| FRP_APL_BADINPUT  | 9   | FRP NOT Estimated | Some input files are incomplete or corrupted .                                                                                                                                                                          |
| FRP_APL_WATER     | 10  | FRP NOT Estimated | Water body and so not processed for fire detection, introduced in version 2.0.                                                                                                                                          |
| FRP_APL_WATEREDGE | 11  | FRP NOT Estimated | No fire detection took place because the pixel is close to a water body.                                                                                                                                                |
| FRP_APL_NOTPROC   | 254 | FRP NOT Estimated | The pixels have not been processed (i.e. they are urban, snow and ice or other non-processed pixels).                                                                                                                   |
| FRP_OUTSIDE_ROIS  | 255 | FRP NOT Estimated | Celestial background (outside the full disk area, introduced in version 2.0)                                                                                                                                            |

95

96

97

### S3. FRP-GRID Product Files

98 Every hour the LSA SAF processing chain generates one FRP-GRID output file (~

99 850 Kb) for the entire Meteosat disk, according to the following name convention:

100

**HDF5\_LSASAF\_MSG\_FRP\_Frp\_Grid\_Global\_YYYYMMDDSSSE.h5**

101

102

103 where YYYY, MM, DD, SS and EE respectively denote the year, the month, the day,

104

the starting and end hour of the analysed period.

105

106 Table S2 indicates the content of each FRP-GRID file, where the value of each

107

variable is obtained according to the following formula:

108

$$\text{Real\_value} = \text{Stored\_value} / \text{Scale\_factor}$$

109

Where the Stored\_value is the two byte integer recorded in the FRP-GRID product

110

file. An example of the content of an FRP-GRID Product file was shown as Figure 16

111

in the main paper. The value stored in each grid cell also includes a code for where no

112 | fires have been found, either due to “input data missing” (32767) or “no detected fire  
 113 | in the grid cell” (0).

Deleted: 327671

114  
 115  
 116  
 117

Table S2. FRP-GRID product file datasets (stored at each 5° grid cell as a 2D matrix).

| VARIABLE        | MEANING                                                                                                                                                                             | UNITS | SCALE FACTOR | RANGE      |
|-----------------|-------------------------------------------------------------------------------------------------------------------------------------------------------------------------------------|-------|--------------|------------|
| GFRP            | Grid cell atmospherically corrected, bias-adjusted FRP. Calculated as an hourly average, with the bias-adjustment factors of Table 5 and the cloud cover correction applied.        | MW    | 0.1          | > 0        |
| GFRP_RANGE      | Max - min difference in the FRP values recorded in the grid cell within the 1 hour period                                                                                           | MW    | 1            | > 0        |
| GRIDPIX         | Number of SEVIRI pixels in the 5.0° grid cell used for the estimation of the BURNTSURF parameter                                                                                    | p.n.  | 1            | > 0        |
| NUMIMG          | Number of SEVIRI images used for the temporal average (max = 4)                                                                                                                     | p.n.  | 1            | >=0        |
| NUMFIRES        | Mean number of fire pixels detected in the grid cell during the 1 hour period                                                                                                       | p.n.  | 100          | >= 0       |
| BURNTSURF       | Percentage of pixels in the grid that had an active fire detection within them in the 1 hour period                                                                                 | p.n.  | 100          | [0,100]    |
| LATITUDE        | Latitudinal centre of the grid cell                                                                                                                                                 | Deg   | 100          | [-90,90]   |
| LONGITUDE       | Longitudinal centre of the current grid cell                                                                                                                                        | Deg   | 100          | [-180,180] |
| GFRP_CLOUD_CORR | Factor accounting for cloud coverage in the 5.0° grid box, averaged over 1 hour (1 means cloud free). Divide the GFRP value by this value to remove the cloud cover correction.     | p.n.  | 100          | [0,1]      |
| ATMTRANS        | Mean atmospheric transmittance in the 5.0° grid cell, taken from the contributing FRP-PIXEL products                                                                                | p.n.  | 10000        | [0,1]      |
| GFRP_ERROR      | Total error associated with GFRP, taking into account FRP_UNCERTAINTY from the FRP-PIXEL List Product, as well as the errors associated with the region-specific adjustment factors | MW    | 1            | >0         |
| GFRP_ERR_FRP    | Error in GRP attributed solely to FRP_UNCERTAINTY in the FRP-PIXEL List Product                                                                                                     | MW    | 1            | >0         |

Deleted:

|         |                                                          |     |     |       |
|---------|----------------------------------------------------------|-----|-----|-------|
| GFRP_QI | Quality indicator associated with the estimation of GFRP | p.n | 100 | [0,1] |
|---------|----------------------------------------------------------|-----|-----|-------|

120
